# Supplementary material
Source: ML conference proceedings conference paper supplement (https://openreview.net/forum?id=uCXNOeL0TG)
Supplement: supplementary_material [file attachment]

---

# Fairness for Workers Who Pull the Arms: An Index Based Policy for Allocation of Restless Bandit Tasks

---

Anonymous Author(s)

Affiliation

Address

email

## Abstract

1 Motivated by applications such as machine repair, project monitoring, and anti-  
2 poaching patrol scheduling, we study intervention planning of stochastic processes  
3 under resource constraints. This planning problem has previously been modeled as  
4 restless multi-armed bandits (RMAB), where each arm is an intervention-dependent  
5 Markov Decision Process. However, the existing literature assumes all intervention  
6 resources belong to a single uniform pool, limiting their applicability to real-world  
7 settings where interventions are carried out by a set of workers, each with their own  
8 costs, budgets, and intervention effects. In this work, we consider a novel RMAB  
9 setting, called multi-worker restless bandits (MWRMAB) with heterogeneous  
10 workers. The goal is to plan an intervention schedule that maximizes the expected  
11 reward while satisfying budget constraints on each worker as well as fairness in  
12 terms of the load assigned to each worker. Our contributions are two-fold: (1) we  
13 provide a multi-worker extension of the Whittle index to tackle heterogeneous  
14 costs and per-worker budget and (2) we develop an index-based scheduling policy  
15 to achieve fairness. Further, we evaluate our method on various cost structures and  
16 show that our method significantly outperforms other baselines in terms of fairness  
17 without sacrificing much in reward accumulated.

## 18 1 Introduction

19 Restless multi-armed bandits (RMABs) Whittle [1988] have been used for sequential planning, where  
20 a planner allocates a limited set of  $M$  *intervention resources* across  $N$  *independent heterogeneous*  
21 *arms* (Markov Decision processes) at each time step in order to maximize the long-term expected  
22 reward. The term *restless* denotes that the arms undergo state-transitions even when they are not  
23 acted upon (with a different probability than when they are acted upon). RMABs have been receiving  
24 increasing attention across a wide range of applications such as maintenance [Abbou and Makis,  
25 2019], recommendation systems Meshram *et al.* [2015], anti-poaching patrolling [Qian *et al.*, 2016b],  
26 and adherence monitoring [Akbarzadeh and Mahajan, 2019; Mate *et al.*, 2020]. Although, *rangers*  
27 in anti-poaching, *healthcare workers* in health intervention planning, and *supervisors* in machine  
28 maintenance are all commonly cited examples of human workforce used as intervention resources, the  
29 literature has so far ignored one key reality that the human workforce is heterogeneous—each worker  
30 has their own workload constraints and needs to commit a dedicated time duration for intervening on  
31 an arm. Thus, it is critical to restrict intervention workload for each worker and balance the workload  
32 across them, while also ensuring high effectiveness (reward) of the planning policy.

33 RMAB literature does not consider this heterogeneity and mostly focuses on selecting best arms  
34 assuming that all intervention resources (workers) are interchangeable, i.e., as from a single pool  
35 (homogeneous). However, planning with human workforce requires more expressiveness in the  
36 model, including heterogeneity in costs and intervention effects, worker-specific load constraints, and

37 balanced work allocation. One concrete example is *anti-poaching intervention planning* Qian *et al.*  
 38 [2016a] with  $N$  areas in a national park where timely interventions (patrols) are required to detect as  
 39 many snares as possible across all the areas. These interventions are carried out by a small set of  $M$   
 40 ranger. The problem of selecting a subset of areas at each time step (say, daily) has been modeled as  
 41 an RMAB problem. However, each ranger may incur heterogeneous cost (e.g., distance travelled,  
 42 when assigned to intervene on a particular area) and the total cost incurred by any ranger (e.g., *total*  
 43 distance traveled) must not exceed a given budget. Additionally, it is important to ensure that tasks  
 44 are allocated fairly across rangers so that, for e.g., some rangers are not required to walk far greater  
 45 distances than others. Adding this level of expressiveness to existing RMAB models is non-trivial.

46 To address this, we introduce the *multi-worker restless multi-armed bandits* (MWRMAB) problem.  
 47 Since MWRMABs are more general than the classical RMABs, they are at least PSPACE hard to  
 48 solve optimally [Papadimitriou and Tsitsiklis, 1994]. RMABs with  $k$ -state arms require solving a  
 49 combined MDP with  $k^N$  states and  $|M + 1|^N$  actions constrained by a budget, and thus suffers from  
 50 the curse of dimensionality. A typical approach is to compute Whittle indices [Whittle, 1988] for  
 51 each arm and choose  $M$  arms with highest index values—an asymptotically optimal solution under  
 52 the technical condition *indexability* [Weber and Weiss, 1990]. However, this approach is limited to  
 53 instances a single type of intervention resource incurring one unit cost upon intervention. A few papers  
 54 on RMABs [Glazebrook *et al.*, 2011; Meshram and Kaza, 2020] study multiple interventions and  
 55 non-unitary costs but assumes one global budget (instead of per-worker budget). Existing solutions  
 56 aim at maximizing reward by selecting arms with highest index values that may not guarantee fairness  
 57 towards the workers who are in charge of providing interventions.

58 To the best of our knowledge, we are the first to introduce and formalize the multi-worker restless  
 59 multi-armed bandit (MWRMAB) problem and a related worker-centric fairness constraint. We  
 60 develop a novel framework for solving the MWRMAB problem. Further, we empirically evaluate our  
 61 algorithm to show that it is fair and scalable across a range of experimental settings.

## 62 2 Related Work

63 **Multi-Action RMABs and Weakly Coupled MDPs** Glazebrook *et al.* [2011] develop closed-form  
 64 solutions for multi-action RMABs using Lagrangian relaxation. Meshram and Kaza [2020] build  
 65 simulation-based policies that rely on monte-carlo estimation of state-action values. However,  
 66 critically, these approaches rely on actions being constrained by a single budget, failing to capture the  
 67 heterogeneity of workforce. On the other hand, weakly coupled MDPs (WCMDPs) Hawkins [2003]  
 68 allow for such multiple budget constraints; this is the baseline we compare against. Other theoretical  
 69 works Adelman and Mersereau [2008]; Gocgun and Ghatge [2012] have developed solutions in terms  
 70 of the reward accumulated, but may not scale well with increasing problem size. These papers do not  
 71 consider fairness, a crucial component of MWRMABs, which our algorithm addresses.

72 **Fairness** in stochastic and contextual multi-armed bandits (MABs) [Patil *et al.*, 2020; Joseph *et al.*,  
 73 2016; Chen *et al.*, 2020] has been receiving significant attention. However, fairness in RMABs has  
 74 been less explored. Recent work by Herlihy *et al.* [2021] considered quota-based fairness of RMAB  
 75 arms assuming that arms correspond to human beneficiaries (for example, patients). However, in our  
 76 work, we consider an orthogonal problem of satisfying the fairness among intervention resources  
 77 (workers) instead of arms (tasks).

78 **Fair allocation** of discrete items among a set of agents has been a well studied topic [Brandt *et al.*,  
 79 2016]. Fairness notions such as envy-freeness up to one item [Budish, 2011] and their budgeted  
 80 settings [Wu *et al.*, 2021; Biswas and Barman, 2018] align with the fairness notion we consider.  
 81 However, these papers do not consider non-stationary (MDP) items. Moreover, these papers assume  
 82 that each agent has a value for every item; both fairness and efficiency are defined with respect to this  
 83 valuation. In contrast, in MWRMAB, efficiency is defined based on reward accumulated and fairness  
 84 and budget feasibility are defined based on the cost incurred.

## 85 3 The Model

86 There are  $M$  workers for providing interventions on  $N$  independent arms that follow Markov Decision  
 87 Processes (MDPs). Each MDP  $i \in [N]$  is a tuple  $\langle S_i, A_i, C_i, P_i, R_i \rangle$ , where  $S_i$  is a finite set of states.  
 88 We represent each worker as an action, along with an additional action called *no-intervention*. Thus,

89 action set is  $A_i \subseteq [M] \cup \{0\}$ .  $C_i$  is a vector of costs  $c_{ij}$  incurred when an action  $j \in [A_i]$  is taken on  
 90 an arm  $i \in [N]$ , and  $c_{ij} = 0$  when  $j = 0$ .  $P_{ij}^{ss'}$  is the probability of transitioning from state  $s$  to state  
 91  $s'$  when arm  $i$  is allocated to worker  $j$ .  $R_i(s)$  is the reward obtained in state  $s \in S_i$ .

92 The goal (Eq. 1) is to allocate a subset of arms to each worker such that the expected reward is  
 93 maximized while ensuring that each worker incurs a cost of at most a fixed value  $B$ . Additionally,  
 94 the disparity in the costs incurred between any pair of workers does not exceed a *fairness threshold*  $\epsilon$   
 95 at a given time step. Let us denote a policy  $\pi : \times_i S_i \mapsto \times_i A_i$  that maps the current state profile of  
 96 arms to an action profile.  $x_{ij}^\pi(s) \in \{0, 1\}$  indicates whether worker  $j$  intervenes on arm  $i$  at state  $s$   
 97 under policy  $\pi$ . The total cost incurred by  $j$  at a time step  $t$  is given by  $\overline{C}_j^\pi(t) := \sum_{i \in N} c_{ij} x_{ij}^\pi(s_i(t))$ ,  
 98 where  $s_i(t)$  is the current state.  $\epsilon \geq c^m := \max_{i,j} c_{ij}$  ensures feasibility of the fairness constraints.

$$\begin{aligned}
 & \max_{\pi} \limsup_{T \rightarrow \infty} \frac{1}{T} \sum_{i \in [N]} \mathbb{E} \left[ \sum_{t=1}^T R_i(s_i(t)) x_{ij}^\pi(s_i(t)) \right] \\
 & \text{s.t. } \sum_{i \in N} x_{ij}^\pi(s_i(t)) c_{ij} \leq B, \quad \forall j \in [M], \forall t \in \{1, 2, \dots\} \\
 & \quad \sum_{j \in A_i} x_{ij}^\pi(s_i(t)) = 1, \quad \forall i \in [N], \forall t \in \{1, 2, \dots\} \\
 & \quad \max_j \overline{C}_j^\pi(t) - \min_j \overline{C}_j^\pi(t) \leq \epsilon, \quad \forall t \in \{1, 2, \dots\} \\
 & \quad x_{ij}^\pi(s_i(t)) \in \{0, 1\}, \quad \forall i, \forall j, \forall t.
 \end{aligned} \tag{1}$$

99 When  $M = 1$  and  $c_{i1} = 1$ , Problem (1) becomes classical RMAB problem (with two actions,  
 100 *active* and *passive*) that can be solved via Whittle Index method [Whittle, 1988] by considering a  
 101 time-averaged relaxed version of the budget constraint and then decomposing the problem into  $N$   
 102 subproblems—each subproblem finds a **charge**  $\lambda_i(s)$  on active action that makes passive action as  
 103 valuable as the active action at state  $s$ . It then selects top  $B$  arms according to  $\lambda_i$  values at their  
 104 current states. However, the challenges involved in solving a general MWRMAB (Eq. 1) are (i) index  
 105 computation becomes non-trivial with  $M > 1$  workers and (ii) selecting top arms based on indices  
 106 may not satisfy fairness. To tackle these challenges, we propose a framework in the next section.

## 107 4 Methodology

108 **Step 1:** Decompose the combinatorial MWRMAB problem to  $N \times M$  subproblems, and compute  
 109 Whittle indices  $\lambda_{ij}^*$  for each subproblem. We tackle this in Sec. 4.1. This step assumes that, for each  
 110 arm  $i$ , MDPs corresponding to any pair of workers are mutually independent. However, the expected  
 111 value of each arm may depend on interventions taken by multiple workers at different timesteps.

112 **Step 2:** Adjust the decoupled indices  $\lambda_{ij}^*$  to create  $\lambda_{ij}^{adj,*}$ , detailed in Sec. 4.2.

113 **Step 3:** The adjusted indices are used for allocating the arms to workers while ensuring **fairness** and  
 114 **per-timestep budget feasibility** among workers, detailed in Sec. 4.3.

### 115 4.1 Identifying subproblem structure

116 To arrive at a solution strategy, we relax the per-timestep budget constraints of Eq. 1 to time-  
 117 averaged constraints, as follows:  $\frac{1}{T} \sum_{i \in [N]} \mathbb{E} \sum_{t=1}^T x_{ij}^\pi(s_i(t)) c_{ij} \leq B$ ,  $\forall j \in [M]$ . The optimization  
 118 problem (1) can be rewritten as:

$$\begin{aligned}
 & \min_{\{\lambda_j \geq 0\}} \max_{\pi} \limsup_{T \rightarrow \infty} \frac{1}{T} \sum_{i \in [N]} \mathbb{E} \left[ \sum_{t=1}^T \left( R_i(s_i(t)) x_{ij}^\pi(s_i(t)) + \sum_{j \in [M]} \lambda_j (B - c_{ij} x_{ij}^\pi(s_i(t))) \right) \right] \\
 & \text{s.t. } \sum_{j \in A_i} x_{ij}^\pi(s_i(t)) = 1, \quad \forall i \in [N], t \in \{1, 2, \dots\} \\
 & \quad \max_j \overline{C}_j^\pi(t) - \min_j \overline{C}_j^\pi(t) \leq \epsilon, \quad \forall t \in \{1, 2, \dots\} \\
 & \quad x_{ij}^\pi(s_i(t)) \in \{0, 1\}, \quad \forall i, \forall j, \forall t
 \end{aligned} \tag{2}$$

Here,  $\lambda_j$ s are Lagrangian multipliers corresponding to each relaxed budget constraint  $j \in [M]$ . Furthermore, as mentioned in Glazebrook *et al.* [2011], if an arm  $i$  is *indexable*, then the optimization objective (2) can be decomposed into  $N$  independent subproblems, and separate index functions can be defined for each arm  $i$ . Leveraging this, we decompose our problem to  $N \times M$  subproblems, each finding the minimum  $\lambda_{ij}$  that maximizes the following:

$$\limsup_{T \rightarrow \infty} \frac{1}{T} \mathbb{E} \left[ \sum_{t=1}^T (R_i(s_i(t)) - \lambda_{ij} c_{ij}) x_{ij}^\pi(s_i(t)) \right] \quad (3)$$

Note that, the maximization subproblem (3) does not have the term  $\lambda_{ij} B$  since the term does not depend on the decision  $x_{ij}^\pi(s_i(t))$ . Considering a 2-action MDP with action space  $\mathcal{A}_{ij} = \{0, j\}$  for an arm-worker pair, the maximization problem (3) can be solved by dynamic programming methods using Bellman's equations for each state to decide whether to take an active action ( $x_{ij}(s) = 1$ ) when the arm is currently at state  $s$ :

$$V_{i,j}^t(s, \lambda_{ij}, x_{ij}(t)) = \begin{cases} R_i(s) - \lambda_{ij} c_{ij} + \sum_{s' \in \mathcal{S}_i} P_{ss'}^{ij} V_{i,j}^{t+1}(s', \lambda_{ij}), & \text{if } x_{ij}(t) = 1 \\ R_i(s) + \sum_{s' \in \mathcal{S}_i} P_{ss'}^{i0} V_{i,j}^{t+1}(s', \lambda_{ij}), & \text{if } x_{ij}(t) = 0 \end{cases} \quad (4)$$

$$\lambda_{ij}^*(s) = \arg \min \{ \lambda : V_{i,j}^t(s, \lambda, j) = V_{i,j}^t(s, \lambda, 0) \} \quad (5)$$

We compute the Whittle indices  $\lambda_{ij}^*$  (Eq. 5) [Qian *et al.*, 2016b] (the algorithm is in Appendix A).

Additionally, we establish that the Whittle indices of multiple workers are related when the costs and transition probabilities possess certain characteristics, enabling simplification of Whittle Index computation for multiple workers when there are certain structures in the MWRMAB problem.

**Theorem 1.** *For an arm  $i$ , and a pair of workers  $j$  and  $j'$  such that  $c_{ij} \neq c_{ij'}$  and  $P_{ss'}^{ij} = P_{ss'}^{ij'}$  for every  $s, s' \in \mathcal{S}_i$ , then their Whittle Indices are inversely proportional to their costs.*

$$\frac{\lambda_{ij}^*(s)}{\lambda_{ij'}^*(s)} = \frac{c_{ij'}}{c_{ij}} \text{ for each state } s \in \mathcal{S}_i$$

*Proof.* Let us consider an arm  $i$  and a pair of workers  $j$  and  $j'$  such that  $P_{ss'}^{ij} = P_{ss'}^{ij'}$ . By definition of Whittle Index  $\lambda_j(s)$  for a worker  $j$ , it is the minimum value at a state  $s$  such that,

$$V_{ij}(s, \lambda_j(s), j) - V_{ij}(s, \lambda_j(s), 0) = 0 \quad (6)$$

Eq. 6 can be rewritten by expanding the value functions as:

$$\begin{aligned} R_i(s) - \lambda_j(s) c_{ij} + \sum_{s' \in \mathcal{S}_i} P_{ss'}^{ij} V_i(s', \lambda_j(s)) - R_i(s) + \sum_{s' \in \mathcal{S}_i} P_{ss'}^{i0} V_i(s', \lambda_j(s)) &= 0 \\ \implies -\lambda_j(s) c_{ij} + \sum_{s' \in \mathcal{S}_i} P_{ss'}^{ij} V_i(s', \lambda_j(s)) - \sum_{s' \in \mathcal{S}_i} P_{ss'}^{i0} V_i(s', \lambda_j(s)) &= 0 \end{aligned} \quad (7)$$

where,  $V_i(s', \lambda_j(s')) = \max_{a \in \{0, j\}} R_i(s) - a \lambda_j(s) c_{ij} + \mathbb{E}_{s''} [V_i(s'', \lambda(s))]$ .

Next, we substitute all  $\lambda_j(s)$  terms by  $\frac{x}{c_{ij}}$ . After substitution, Eq. 7 is a function of  $x$  only, i.e., no  $\lambda(s)$  or  $c_{ij}$  terms remain after substitution. We can rewrite Eq. 7 as:

$$-x + \sum_{s' \in \mathcal{S}_i} P_{ss'}^{ij} V_i(s', x) - \sum_{s' \in \mathcal{S}_i} P_{ss'}^{i0} V_i(s', x) = 0 \quad (8)$$

Note that  $x^*$  that minimizes Eq. 8 corresponds to  $\lambda_j(s) c_{ij}$  for any  $j$ , where  $\lambda_j(s)$  is the Whittle index for worker  $j$ . Therefore, for any two workers  $j$  and  $j'$  with corresponding Whittle Indices as  $\lambda_j(s)$  and  $\lambda_{j'}(s)$ , we obtain  $\lambda_j(s) c_{ij} = \lambda_{j'}(s) c_{ij'}$  whenever  $P_{ss'}^{ij} = P_{ss'}^{ij'}$ . This completes the proof.  $\square$

Theorem 1 also implies that, when the costs and effectiveness of two workers are equal, then their Whittle indices are also equal, stated formally in Corollary 1.

**Corollary 1.** *For an arm  $i$ , and a pair of workers  $j$  and  $j'$  such that  $c_{ij} = c_{ij'}$  and  $P_{ss'}^{ij} = P_{ss'}^{ij'}$  for every  $s, s' \in \mathcal{S}_i$ , then their Whittle Indices are the same.*

$$\lambda_{ij}^*(s) = \lambda_{ij'}^*(s) \text{ for each state } s \in \mathcal{S}_i.$$

## 4.2 Adjusting for interaction effects

The indices obtained using Alg. 3 are not indicative of the true long-term value of taking that action in the MWRMAB problem. This is because, for a given arm, the value of an intervention by worker  $j$  in general depends on interventions by other workers  $j'$  at different timesteps.

Consider a 2-worker MWRMAB corresponding to an anti-poaching patrol planning problem, where each worker is a type of “specialist” with different equipment (detailed in Fig. 1).

The first ranger (worker),  $a_1$ , has special equipment for clearing overgrown brush, and the second ranger,  $a_2$ , has specialized equipment for detecting snares, e.g., a metal detector. Assume 3 states for each patrol area  $i$  as “overgrown and snared” ( $s = 0$ ), “clear and snared” ( $s = 1$ ), and “clear and not snared” ( $s = 2$ ). Assume that reward is received only for arms in state  $s = 2$ , and that snares cannot be cleared from areas with overgrown brush, i.e.,  $P_{ij}^{02} = 0 \forall j \in [M]$ . If we assume that each worker is a “true” specialist—so, ranger 1’s equipment is ineffective at detecting snares, i.e.,  $P_{i1}^{12} = 0$ , and ranger 2’s equipment is ineffective at clearing overgrown brush, i.e.,  $P_{i2}^{01} = 0$ —then the optimal policy is for ranger 1 to act on the arm in state “overgrown and snared” and ranger 2 to act on the arm in state “clear and snared”. However, the fully decoupled index computation for each ranger  $j$  would reason about restricted MDPs that only have passive action and ranger type  $j$  available. So when computing, e.g., the index for ranger 1 in  $s = 0$ , the restricted MDP would have 0 probability of reaching state “clear and not snared”, since it does not include ranger 2 in its restricted MDP. This would correspond to an MDP that always gives 0 reward, and thus would artificially force the index for ranger 1 to be 0, despite ranger 1 being the optimal action for  $s = 0$ .

To address this, we define a new index notion that accounts for such inter-action effects. The key idea is that, when computing the index for a given worker, we will consider actions of *all other workers in future time steps*. So in our poaching example, the new index value for ranger 1 in  $s = 0$  will *increase* compared to its decoupled index value, because the new index will take into account the value of ranger 2’s actions when the system progresses to  $s = 1$  in the future. Note that the methods we build generalize to any number of workers  $M$ . However, the manner in which we incorporate the actions of other workers must be done carefully. We propose an approach and provide theoretical results explaining why. Finally, we give the full algorithm for computing the new indices.

**New index notion:** For a given arm, to account for the inter-worker action effects, we define the new index for an action  $j$  as the minimum charge that makes an intervention by  $j$  on that arm as valuable as *any* other worker  $j'$  in the combined MDP, with  $M + 1$  actions. That is, we seek the minimum charge for action  $j$  that makes us indifferent between taking action  $j$  and *not* taking action  $j$ , a multi-worker extension Whittle’s index notion. To capture this, we define an augmented reward function  $R_{\lambda}^{\dagger}(s, j) = R(s) - \lambda_j c_j$ . Let  $\lambda$  is the vector of  $\{\lambda_j\}_{j \in [M]}$  charges. We define this **expanded MDP** as  $\mathcal{M}_{\lambda}^{\dagger}$  and the corresponding value function as  $V_{\lambda}^{\dagger}$ . We now find adjusted index  $\lambda_{j, \lambda_{-j}}^{adj,*}$  using the following expression:

$$\min_{j' \in [M] \setminus \{j\}} \arg \min_{\lambda_j} \{ \lambda_j: V_{\lambda_{-j}}^{\dagger}(s, \lambda_j, j) = V_{\lambda_{-j}}^{\dagger}(s, \lambda_j, j') \} \quad (9)$$

where  $\lambda_{-j}$  is a vector of fixed charges for all  $j' \neq j$ , and the outer min over  $j'$  simply captures the specific action  $j'$  that the optimal planner is indifferent to taking over action  $j$  at the new index value. Note, this is the natural extension of the decoupled two-action index definition, Eq. (5), which defines the index as the charge on  $j$  that makes the planner indifferent between acting and, the only other option, being passive. Our new *adjusted index algorithm* is given in Alg. 1.

We use a binary search procedure to compute the adjusted indices since  $V_{\lambda_{-j}}^{\dagger}(s, \lambda_j, j)$  is convex in  $\lambda_j$ . The most important consideration of the adjusted index computation is how to set the charges  $\lambda_{j'}$  of the other action types  $j'$  when computing the index for action  $j$ . We show that a reasonable

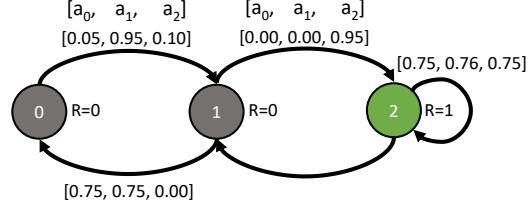

Figure 1: Specialist domain: where specific actions are required in each state to advance to the reward-giving state. Decoupled indices lead to sub-optimal policies, whereas adjusted indices perform well.

---

**Algorithm 1** Adjusted Index Computation
 

---

**Input:** An arm: MDP  $\mathcal{M}^\dagger$ , costs  $c_j$ , state  $s$ , and indices  $\lambda_j^*(s)$ .

```

1: for  $j = 1$  to  $M$  do
2:    $\lambda_j = \lambda_j^*(s)$  {init  $\lambda$ }
3: for  $j = 1$  to  $M$  do
4:   Compute  $\lambda_{j,\lambda_{-j}}^{adj,*}(s)$  {via binary search on Eq. 9}
5: return  $\lambda_{j,\lambda_{-j}}^{adj,*}(s)$  for all workers  $j \in [M]$ 

```

---

choice for  $\lambda_{j'}$  is the Whittle Indices  $\lambda_{j'}^*(s)$  which were pre-computed using Alg. 3. The intuition is that  $\lambda_{j'}^*(s)$  provides a *lower bound* on how valuable the given action  $j'$  is, since it was computed against no-action in the restricted two-action MDP. In Observation 1 and Theorem 2, we describe the problem's structure to motivate these choices.

The following observation explicitly connects decoupled indices and adjusted indices.

**Observation 1.** *For each worker  $j$ , when  $\lambda_{-j} \rightarrow \infty$ , i.e.,  $\lambda_{j'} \rightarrow \infty \forall j' \neq j$ , then the following holds:  $\lambda_{j,\lambda_{-j}}^{adj,*} \rightarrow \lambda_j^*$ .*

This can be seen by considering the rewards  $R_\lambda^\dagger(s, j') = R(s) - \lambda_{j'} c_{j'}$  for taking action  $j'$  in any state  $s$ . As the charge  $\lambda_{j'} \rightarrow \infty$ ,  $R_\lambda^\dagger(s, j') \rightarrow -\infty$ , making it undesirable to take action  $j'$  in the optimal policy. Thus, the optimal policy would only consider actions  $\{0, j\}$ , which reduces to the restricted MDP of the decoupled index computation.

Next we analyze a potential naive choice for  $\lambda_{-j}$  when computing the indices for each  $j$ , namely,  $\lambda_{-j} = 0$ . Though it may seem a natural heuristic, this corresponds to planning *without considering the costs of other actions*, which we show below can lead to arbitrarily low values of the indices, which subsequently can lead to poorly performing policies.

**Theorem 2.** *As  $\lambda_{j'} \rightarrow 0 \forall j' \neq j$ ,  $\lambda_j^{adj,*}$  will monotonically decrease, if (1)  $V_{\lambda_{j'}}^\dagger(s, \lambda_j, j') \geq V_{\lambda_{j'}}^\dagger(s, \lambda_j, 0)$  for  $0 \leq \lambda_{j'} \leq \epsilon$  and (2) if the average cost of worker  $j'$  under the optimal policy starting with action  $j'$  is greater than the average cost of worker  $j'$  under the optimal policy starting with action  $j$ .*

Thm. 2 (proof in Appendix B) confirms that, although setting  $\lambda_{j'} = 0$  for all  $j'$  may seem like a natural option, in many cases it will artificially reduce the index value for action  $j$ . This is because  $\lambda_{j'} = 0$  corresponds to planning as if action  $j'$  comes with *no charge*. Naturally then, as we try to determine the *non-zero* charge  $\lambda_j$  we are willing to pay for action  $j$ , i.e., the index of action  $j$ , *we will be less willing to pay higher charges, since there are free actions  $j'$* . Note that conditions (1) and (2) of the above proof are not restrictive. The first is a common epsilon-neighborhood condition, which requires that value functions do not change in arbitrarily non-smooth ways with  $\lambda$  values near 0. The second requires that a policy's accumulated costs of action  $j'$  are greater when starting with action  $j'$ , than starting from any other action—this is same as assuming that the MDPs do not have arbitrarily long mixing times. That is to say that Thm. 2 applies to a wide range of problems that we care about.

The key question then is: what are reasonable values of charges for other actions  $\lambda_{-j}$ , when computing the index for action  $j$ ? We propose that a good choice is to set each  $\lambda_{j'} \in \lambda_{-j}$  to its corresponding decoupled index value for the current state, i.e.,  $\lambda_{j'}^*(s)$ . The reason relies on the following key idea: we know that at charge  $\lambda_{j'}^*(s)$ , the optimal policy is indifferent between choosing that action  $j'$  and the passive action, at least when  $j'$  is the only action available. Now, assume we are computing the new adjusted index for action  $j$ , when combined in planning with the aforementioned action  $j'$  at charge  $\lambda_{j'}^*(s)$ . Since the charge for  $j'$  is already set at a level that makes the planner indifferent between  $j'$  and being passive, if adding  $j'$  to the planning space with  $j$  does not provide any additional benefit over the passive action, *then the new adjusted index for  $j$  will be the same as the decoupled index for  $j$ , which only planned with  $j$  and the passive action*. This avoids the undesirable effect of getting artificially reduced indices due to under-charging for other actions  $j'$ , i.e., Thm. 2. The ideas follow similarly for whether the adjusted index for  $j$  should increase or decrease relative to its decoupled index value. I.e., if *higher* reward can be achieved when planning with  $j$  and  $j'$  together compared to planning with either action alone, as in the specialist anti-poaching example

then we will become *more willing to pay a charge*  $\lambda_j$  now to help reach states where the action  $j'$  will let us achieve that higher reward. On the other hand, if  $j'$  dominates  $j$  in terms of intervention effect, then even at a reasonable charge for  $j'$ , we will be less willing to pay for action  $j$  when both options are available, and so the adjusted index will decrease. We give our new *adjusted index algorithm* in Alg. 1, and provide experimental results demonstrating its effectiveness.

### 4.3 Allocation Algorithm

We provide a method called *Balanced Allocation* (Alg. 2) to tackle the problem of allocating intervention tasks to each worker in a balanced way. At each time step, given the current states of all the arms  $\{s_i^t\}_{i \in [N]}$ , Alg. 2 creates an ordered list  $\sigma$  among workers based on their highest Whittle Indices  $\max_i \lambda_{ij}(s_i^t)$ . It then allocates the best possible (in terms of Whittle Indices) available arm to each worker according to the order  $\sigma$  in a round-robin way (allocate one arm to a worker and move on to the next worker until the stopping criterion is met). Note that this satisfies the constraint that the same arm cannot be allocated to more than one worker. In situations where the best possible available arm leads to the budget violation  $B$ , an attempt is made to allocate the next best. This process is repeated until there are no more arms left to be allocated. If no available arms could be allocated to a worker  $j$  because of budget violation, then worker  $j$  is removed from the future round-robin allocations and are allocated all the arms in their bundle  $D_j$ . Thus, the budget constraints are always satisfied. Moreover, in the simple setting, when costs and transition probabilities of all workers are equal, this heuristic obtain optimal reward and perfect fairness.

---

#### Algorithm 2 Balanced Allocation

---

**Input:** Current states of each arm  $\{s_i\}_{i \in [N]}$ , index values for each arm-worker  $(i, j)$  pair  $\lambda_{ij}(s_i)$ , costs  $\{c_{ij}\}$ , budget  $B$ , fairness threshold  $\epsilon = c_{max}$ .

**Output:** balanced allocation  $\{D_j\}_{j \in [M]}$  where  $D_j \subseteq [N]$ ,  $D_j \cap D_{j'} = \emptyset \forall j, j' \in [M]$ .

```

1: Initiate allocation  $D_j \leftarrow \emptyset$  for all  $j \in [M]$ 
2: Let  $L \leftarrow \{1, \dots, N\}$  be the set of all unallocated arms
3: while true do
4:   Let  $\tau_j$  be the ordering over  $\lambda_{ij}$  values from highest to lowest:  $\lambda[\tau_j[1]][j] \geq \dots \geq \lambda[\tau_j[N]][j] \geq 0$ 
5:   Let  $\sigma$  be the ordering over workers based on their highest indices:  $\lambda[\tau_1[1]][1] \geq \lambda[\tau_2[1]][2]$  and so on
6:   for  $j = 1$  to  $M$  do
7:     if  $\tau_{\sigma_j} \cap L \neq \emptyset$  then
8:        $x \leftarrow \text{top}(\tau_{\sigma_j}) \cap L$ 
9:       while  $c_{x\sigma_j} + \sum_{h \in D_{\sigma_j}} c_{h\sigma_j} > B$  do
10:         $\tau_{\sigma_j} \leftarrow \tau_{\sigma_j} \setminus \{x\}$ 
11:        if  $\tau_{\sigma_j} \cap L = \emptyset$  then
12:          break
13:        else
14:           $x \leftarrow \text{top}(\tau_{\sigma_j}) \cap L$ 
15:        if  $\tau_{\sigma_j} \cap L \neq \emptyset$  then
16:           $D_{\sigma_j} \leftarrow D_{\sigma_j} \cup \{x\}; L \leftarrow L \setminus \{x\}; \tau_{\sigma_j} \leftarrow \tau_{\sigma_j} \setminus \{x\}$ 
17: return  $\{D_j\}_{j \in [M]}$ 

```

---

**Theorem 3.** When all workers are homogeneous (same costs and transition probabilities on arms after intervention) and satisfy indexability, then our framework outputs the optimal policy while being exactly fair to the workers.

*Proof sketch.* The proof consists of two components: (1) optimality, which can be proved using Corollary 1 (Whittle Indices for homogeneous workers are the same), and the fact that the same costs lead to considering all workers from the same pool of actions, and (2) perfect fairness, using the fact that, when costs are equal, Step 3 of our algorithm divides the arms among workers in a way such that the difference between the number of allocations between two workers differs by at most 1 (see complete proof in Appendix D).

## 5 Empirical Evaluation

We evaluate our framework on three domains, namely **constant unitary costs**, **ordered workers**, and **specialist domain**, each highlighting various challenging dimensions of the MWRMAB problem

(detailed in Appendix C). In the first domain, the cost associated with all worker-arm pairs is the same, but transition probabilities differ; the main challenge is in finding optimal assignments, though fairness is still considered. In the second domain, there exists an ordering among the workers such that the highest (or lowest) ranked worker has the highest (or lowest) probability of transitioning any arm to “good” state; which makes balancing optimal assignments with *fair* assignments challenging. The final domain highlights the need to consider inter-action effects via Step 2.

We run experiments by varying the number of arms for each domain. For the first and third domains that consider unit costs, we use  $B = 4$  budget per worker, and for the second domain where costs are in the range  $[1, 10]$ , we use budget  $B = 18$ . We ran all the experiments on Apple M1 with 3.2 GHz Processor and 16 GB RAM. We evaluate the average reward per arm over a fixed time horizon of 100 steps and averaged over 50 epochs with random or fixed transition probabilities that follow the characteristics of each domain.

**Baselines** We compare our approach, **CWI+BA** (Combined Whittle Index with Balanced Allocation), against:

- **PWI+BA** (Per arm-worker Whittle Index with Balanced Allocation) that combines Steps 1 and 3 of our approach, skipping Step 2 (adjusted index algorithm)
- **CWI+GA** (Combined arm-worker Whittle Index with Greedy Allocation) that combines Steps 1 and 2 and, instead of Step 3 (balanced allocation), the highest values of indices are used for allocating arms to workers while ensuring budget constraint per timestep
- **Hawkins** [2003] solves a discounted version of Eq. 2 without the fairness constraint, to compute values of  $\lambda_j$ , then solves a knapsack over  $\lambda_j$ -adjusted Q-values
- **OPT** computes optimal solutions by running value iteration over the combinatorially-sized exact problem (1) without The fairness constraint.
- **OPT-fair** follows OPT, but adds the fairness constraints. These optimal algorithms are exponential in the number of arms, states, and workers, and thus, could only be executed on small instances.
- **Random** takes random actions  $j \in [M] \cup \{0\}$  on every arm while maintaining budget feasibility for every worker at each timestep

**Results** Figure 2 shows that reward obtained using our framework (CWI+BA) is comparable to that of the reward maximizing baselines (Hawkins and OPT) across all the domains. We observe at most 18.95% reduction in reward compared to OPT, where the highest reduction occurs for ordered workers in Fig. 2(b). In terms of fairness, Figs. 2(a) and (c) show that CWI+BA achieves fair allocation among workers at all timesteps. In Figure 2(b) CWI+BA achieves fair allocation in almost all timesteps. The fraction of timesteps where fairness is attained by CWI+BA is significantly higher than Hawkins and OPT. In fact, Fig 2(b) also shows that Hawkins obtains *unfair* solutions at every timesteps (0 fairness) when  $N=5$  and  $B=18$ , and, when  $N=10$  and  $N=15$ , Hawkins is fair only 0.41 and 0.67 fractions of the time, respectively. **Thus, compared to reward maximizing baselines (Hawkins and OPT), CWI+BA achieves the highest fairness.** We also compare against two versions of our solution approach, namely, PWI+BA and CWI+GA. We observe that PWI+BA accumulates marginally lower reward while CWI+GA performs poorly in terms of fairness, hence asserting the importance of using CWI+BA for the MWRAMB problem.

Fig 3 shows that **CWI+BA is significantly faster than OPT-fair** (the optimal MWRMAB solution), with an execution time improvement of 33%, 78% and 83% for the three domains, respectively, when  $N=5$ . Moreover, for instances with  $N=10$  onwards, both OPT and OPT-fair ran out of memory because the execution of the optimal algorithms required exponentially larger memory. However, we observe that CWI+BA scales well even for  $N = 10$  and  $N = 15$  and runs within a few seconds, on an average.

Fig. 4 further demonstrates that our **CWI+BA scales well** and consistently outputs fair solution for higher values of  $N$  and  $B$ . On larger instances, with  $N \in \{50, 100, 150\}$ , our approach achieves up to 374.92% improvement in fairness with only 6.06% reduction in reward, when compared against the reward-maximizing solution Hawkins [2003].

**In summary, CWI+BA is fairer than reward-maximizing algorithms (Hawkins and OPT) and much faster and scalable compared to the optimal fair solution (OPT fair), while accumulating**



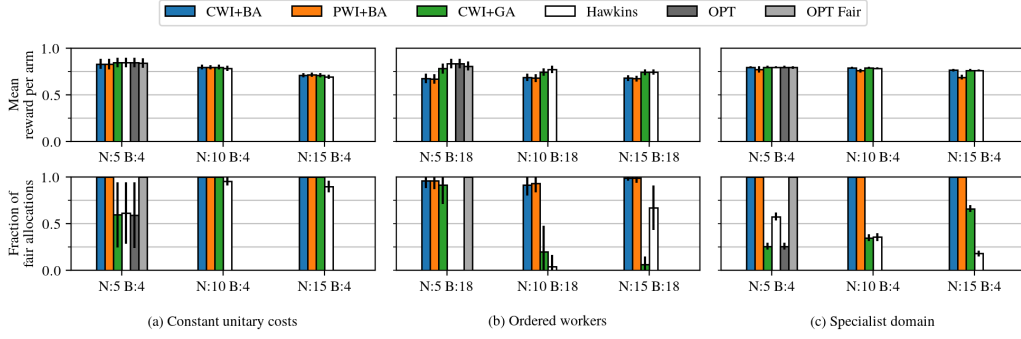

Figure 2: **Mean reward** (top row) and **fraction of time steps with fair allocation** (bottom row) for  $N = 5, 10, 15$  arms. CWI+BA (blue) achieves highest fraction of fair allocations than Hawkins (white) algorithm while **attaining almost similar reward as the reward-maximizing baselines**.

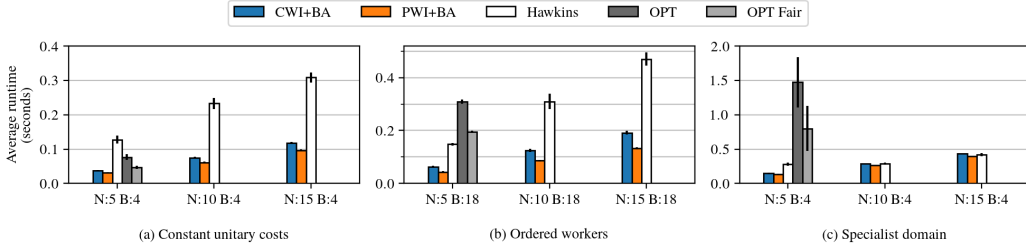

Figure 3: **Execution time** averaged over 50 epochs for  $N = 5, 10, 15$ . For a fixed time horizon of 100 steps, CWI+BA run faster than Hawkins (white), OPT (dark gray), and OPT fair (light gray) for all instances in each of the three domains evaluated.

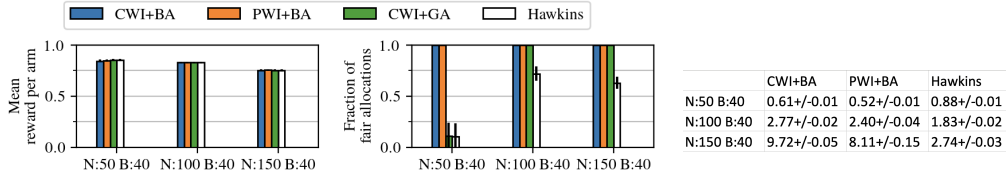

Figure 4: The plot shows **mean reward** (left), **fairness** (middle), and **run time** (right) for  $N = 50, 100, 150$  arms on **constant unitary costs** domain. CWI+GA scales well for larger instances, and even for  $N=150$  arms, the average runtime is 10 seconds.

327 **reward comparable to Hawkins and OPT across all domains.** Therefore, CWI+BA is shown to  
 328 be a fair and efficient solution for the MWRMAB problem.

## 329 6 Conclusion

330 We are the first to introduce multi-worker restless multi-armed bandit (MWRMAB) problem with  
 331 worker-centric fairness. Our approach provides a scalable solution for the computationally hard  
 332 MWRMAB problem. On comparing our approach against the (non-scalable) optimal fair policy on  
 333 smaller instances, we find almost similar reward and fairness.

334 Our problem formulation provides a more general model for the intervention planning problem  
 335 capturing heterogeneity of intervention resources, and thus it is useful to appropriately model real-  
 336 world domains such as anti-poaching patrolling and machine maintenance, where the interventions  
 337 are provided by a human workforce.

## References

- Abderrahmane Abbou and Viliam Makis. Group maintenance: A restless bandits approach. *INFORMS Journal on Computing*, 31(4):719–731, 2019.
- Daniel Adelman and Adam J. Mersereau. Relaxations of weakly coupled stochastic dynamic programs. *Operations Research*, 56(3):712–727, 2008.
- N. Akbarzadeh and A. Mahajan. Restless bandits with controlled restarts: Indexability and computation of whittle index. In *2019 IEEE Conference on Decision and Control*. IEEE, 2019.
- Arpita Biswas and Siddharth Barman. Fair division under cardinality constraints. In *Proceedings of the 27th International Joint Conference on Artificial Intelligence*, pages 91–97, 2018.
- Felix Brandt, Vincent Conitzer, Ulle Endriss, Jérôme Lang, and Ariel D Procaccia. *Handbook of computational social choice, Chapter 12*. Cambridge University Press, 2016.
- Eric Budish. The combinatorial assignment problem: Approximate competitive equilibrium from equal incomes. *Journal of Political Economy*, 119(6):1061–1103, 2011.
- Yifang Chen, Alex Cuellar, Haipeng Luo, Jignesh Modi, Heramb Nemlekar, and Stefanos Nikolaidis. Fair contextual multi-armed bandits: Theory and experiments. In *Conference on Uncertainty in Artificial Intelligence*, pages 181–190. PMLR, 2020.
- Kevin D. Glazebrook, David J. Hodge, and Christopher Kirkbride. General notions of indexability for queueing control and asset management. *The Annals of Applied Probability*, 21(3):876–907, 2011.
- Yasin Gocgun and Archis Ghate. Lagrangian relaxation and constraint generation for allocation and advanced scheduling. *Computers & Operations Research*, 39(10):2323–2336, 2012.
- Jeffrey Thomas Hawkins. *A Lagrangian decomposition approach to weakly coupled dynamic optimization problems and its applications*. PhD thesis, Massachusetts Institute of Technology, 2003.
- Christine Herlihy, Aviva Prins, Aravind Srinivasan, and John Dickerson. Planning to fairly allocate: Probabilistic fairness in the restless bandit setting. *arXiv preprint arXiv:2106.07677*, 2021.
- Matthew Joseph, Michael Kearns, Jamie H Morgenstern, and Aaron Roth. Fairness in learning: Classic and contextual bandits. *Advances in Neural Information Processing Systems*, 29:325–333, 2016.
- Aditya Mate, Jackson A Killian, Haifeng Xu, Andrew Perrault, and Milind Tambe. Collapsing bandits and their application to public health interventions. In *Advances in Neural Information Processing Systems*, 2020.
- Rahul Meshram and Kesav Kaza. Simulation based algorithms for markov decision processes and multi-action restless bandits. *arXiv preprint arXiv:2007.12933*, 2020.
- Rahul Meshram, D Manjunath, and Aditya Gopalan. A restless bandit with no observable states for recommendation systems and communication link scheduling. In *2015 54th IEEE Conference on Decision and Control (CDC)*, pages 7820–7825. IEEE, 2015.
- Christos H Papadimitriou and John N Tsitsiklis. The complexity of optimal queueing network control. In *Proceedings of IEEE 9th Annual Conference on Structure in Complexity Theory*, pages 318–322. IEEE, 1994.
- Vishakha Patil, Ganesh Ghalme, Vineet Nair, and Y Narahari. Achieving fairness in the stochastic multi-armed bandit problem. In *Proceedings of the AAAI Conference on Artificial Intelligence*, volume 34, pages 5379–5386, 2020.
- Y. Qian, C. Zhang, B. Krishnamachari, and B. Tambe. Restless poachers: Handling exploration-exploitation tradeoffs in security domains. In *International Joint Conference on Autonomous Agents and Multi-Agent Systems, AAMAS*. IFAAMAS, 2016.

- 383 Yundi Qian, Chao Zhang, Bhaskar Krishnamachari, and Milind Tambe. Restless poachers: Handling  
 384 exploration-exploitation tradeoffs in security domains. In *Proceedings of the 2016 International*  
 385 *Conference on Autonomous Agents & Multiagent Systems*, pages 123–131, 2016.
- 386 Richard R Weber and Gideon Weiss. On an index policy for restless bandits. *J. Appl. Probab.*,  
 387 27(3):637–648, 1990.
- 388 Peter Whittle. Restless bandits: Activity allocation in a changing world. *Journal of applied probability*,  
 389 pages 287–298, 1988.
- 390 Xiaowei Wu, Bo Li, and Jiarui Gan. Budget-feasible maximum nash social welfare is almost envy-  
 391 free. In *The 30th International Joint Conference on Artificial Intelligence (IJCAI 2021)*, pages  
 392 1–16, 2021.

## 393 Checklist

- 394 1. For all authors...
- 395 (a) Do the main claims made in the abstract and introduction accurately reflect the paper’s  
 396 contributions and scope? [Yes]
- 397 (b) Did you describe the limitations of your work? [Yes] (see Appendix E)
- 398 (c) Did you discuss any potential negative societal impacts of your work? [Yes] (see  
 399 Appendix E)
- 400 (d) Have you read the ethics review guidelines and ensured that your paper conforms to  
 401 them? [Yes]
- 402 2. If you are including theoretical results...
- 403 (a) Did you state the full set of assumptions of all theoretical results? [Yes]
- 404 (b) Did you include complete proofs of all theoretical results? [Yes]
- 405 3. If you ran experiments...
- 406 (a) Did you include the code, data, and instructions needed to reproduce the main experi-  
 407 mental results (either in the supplemental material or as a URL)? [Yes]
- 408 (b) Did you specify all the training details (e.g., data splits, hyperparameters, how they  
 409 were chosen)? [Yes]
- 410 (c) Did you report error bars (e.g., with respect to the random seed after running experi-  
 411 ments multiple times)? [Yes]
- 412 (d) Did you include the total amount of compute and the type of resources used (e.g., type  
 413 of GPUs, internal cluster, or cloud provider)? [Yes]
- 414 4. If you are using existing assets (e.g., code, data, models) or curating/releasing new assets...
- 415 (a) If your work uses existing assets, did you cite the creators? [Yes]
- 416 (b) Did you mention the license of the assets? [N/A]
- 417 (c) Did you include any new assets either in the supplemental material or as a URL? [Yes]
- 418 (d) Did you discuss whether and how consent was obtained from people whose data you’re  
 419 using/curating? [N/A]
- 420 (e) Did you discuss whether the data you are using/curating contains personally identifiable  
 421 information or offensive content? [N/A]
- 422 5. If you used crowdsourcing or conducted research with human subjects...
- 423 (a) Did you include the full text of instructions given to participants and screenshots, if  
 424 applicable? [N/A]
- 425 (b) Did you describe any potential participant risks, with links to Institutional Review  
 426 Board (IRB) approvals, if applicable? [N/A]
- 427 (c) Did you include the estimated hourly wage paid to participants and the total amount  
 428 spent on participant compensation? [N/A]

## 429 A Whittle Index computation

---

### Algorithm 3 Whittle Index Computation Qian *et al.* [2016b]

---

**Input:** Two-action MDP<sub>*ij*</sub> and cost  $c_{ij}$

**Output:** Decoupled Whittle index  $\lambda_{ij}^*(s)$  for each  $s \in \mathcal{S}_i$ .

```

1:  $ub, lb = \text{INITBSBOUNDS}(\text{MDP}_{ij})$  {Return upper and lower bounds on  $\lambda_{ij}^*(s)$  given MDPij}
2: while  $ub - lb > \epsilon$  do
3:    $\lambda_{ij} = \frac{ub+lb}{2}$ 
4:    $a = \text{VALUEITERATION}(\text{MDP}_{ij}, s, \lambda_{ij})$  {with updated reward  $R(s, a, \lambda_j) = R(s) - c_{ij}\lambda_{ij}$ }
5:   if  $a \neq j$  then
6:      $ub = \lambda_{ij}$  {Charging too much, decrease}
7:   else if  $a = j$  then
8:      $lb = \lambda_{ij}$  {Can charge more, increase}
9:    $\lambda_{ij}^*(s) = \frac{ub+lb}{2}$ 
10: return  $\lambda_{ij}^*(s)$ 

```

---

## 430 B Proof of Theorem 2

**Theorem 2.** As  $\lambda_{j'} \rightarrow 0 \ \forall j' \neq j$ ,  $\lambda_j^{adj,*}$  will monotonically decrease, if (1)  $V_{\lambda_{j'}}^\dagger(s, \lambda_j, j') \geq V_{\lambda_{j'}}^\dagger(s, \lambda_j, 0)$  for  $0 \leq \lambda_{j'} \leq \epsilon$  and (2) if the average cost of worker  $j'$  under the optimal policy starting with action  $j'$  is greater than the average cost of worker  $j'$  under the optimal policy starting with action  $j$ .

*Proof.* Let  $j'$  be the action such that

$$V_{\lambda_{j'}=\epsilon}^\dagger(s, \lambda_{j, \lambda_{j'}=\epsilon}^{adj,*}, a = j') = V_{\lambda_{j'}=\epsilon}^\dagger(s, \lambda_{j, \lambda_{j'}=\epsilon}^{adj,*}, a = j)$$

when  $\lambda_{j'} = \epsilon$  and  $\lambda_{j''} = 0 \ \forall j'' \in [M] \setminus \{j, j'\}$ . Then at  $\lambda_{j'} = 0$ , both  $V_{\lambda_{j'}}^\dagger(s, \lambda_j, a = j')$  and  $V_{\lambda_{j'}}^\dagger(s, \lambda_j, a = j)$  will increase since the charge for taking action  $j'$  decreases. Moreover, given (1),  $j'$  will still be the “next-best” action to take, when computing the new  $\lambda_{j, \lambda_{j'}=0}^{adj,*}$ . Given (2), we have the following:

$$\frac{dV_{\lambda_{j'}}^\dagger(s, \lambda_j, j')}{d\lambda_{j'}} \geq \frac{dV_{\lambda_{j'}}^\dagger(s, \lambda_j, j)}{d\lambda_{j'}} \quad (10)$$

Which implies that, when  $\lambda_{j'}$  changes from  $\epsilon$  to 0, the curve (in  $\lambda_j$ -space)  $V_{\lambda_{j'}=0}^\dagger(s, \lambda_j, a = j')$  increases (shifts up) by an amount equal to or larger than the curve  $V_{\lambda_{j'}=0}^\dagger(s, \lambda_j, a = j)$ . Since both curves are convex and monotone decreasing in  $\lambda_j$ , and since  $V_{\lambda_{j'}}^\dagger(s, \lambda_j, a = j) > V_{\lambda_{j'}}^\dagger(s, \lambda_j, a = j')$  at points  $\lambda_j < \lambda_{j, \lambda_{j'}}^{adj,*}$  by definition of the index in Eq. 9 and convexity, this implies that the point of intersection of those two curves in  $\lambda_j$ -space has decreased (shifted left), i.e.,  $\lambda_{j, \lambda_{j'}=0}^{adj,*} \leq \lambda_{j, \lambda_{j'}=\epsilon}^{adj,*}$ .  $\square$

## 445 C Experimental Domains

**Constant Costs:** In this setting, all arm-worker assignment costs are the same, i.e., every  $c_{i,j} = c$  for all  $i \in [N]$  and  $j \in [M]$  but the transition probabilities differ. The transition probabilities are generated in a way that ensures intervening on is better than no-intervention, i.e.,  $P_{ij}^{ss'} \geq P_{i0}^{ss'}$  for any pair of states  $s$  and  $s'$  and any  $j \in [M]$ . For the simulation, we assume 2 states and 2 workers, and vary the number of arms and budget. This domain captures real-world settings such as project management—one of the original inspirations of Whittle [1988], that we extend to multiple workers—where the goal is to find optimal assignments over a sequence of rounds, while ensuring equitable assignments among workers each round.

**Ordered Workers:** In this setting, there is an ordering on the effectiveness among the workers—worker 1 produces better intervention effects than worker 2 on all arms, worker 2 produces better

intervention effects than worker 3, and so on. For the simulation, we generate transition probabilities in a way that ensures this ordering. This problem structure makes reward-maximizing (fairness-unaware) algorithms produce unfair solutions, since they prefer to over-assign to certain workers. Additionally, we assign the costs  $c_{ij}$ s by drawing values uniformly at random in the range  $[1 - 10]$ , making it challenging to find well-performing solutions that also satisfy the budget. We consider 2 states and 3 workers, while varying the number of arms and budget. This domain is relevant to settings where workers have different levels of proficiency, i.e., deliver interventions that are more likely to boost arms to a good state, and where a measure of effort is considered during planning, causing different costs  $c_{ij}$ , e.g., due to differing travel times from workers to arms.

**Specialist Domain:** In this domain, the MDPs for each arm have transition probabilities as given in Fig. 1. These MDPs have a structure such that certain states require “specialist” worker actions to move to a new state. This is the same as the anti-poaching example given in section 4.2. Specifically, the optimal policy should assign arms in state 0 to worker 1 and arms in state 1 to worker 2. However, the decoupled index computation (Step 1) produces indices that lead to suboptimal policies, since it considers restricted MDPs with only 2-actions at a time. Alternatively, our adjusted index computation (Step 1+2) reasons about inter-action effects properly and so should perform near-optimally. For the simulation, we consider 3 states and 2 workers.

### 473 D Proof of Theorem 3

First we, define the technical condition, called *indexability*, under which choosing top arms according to Whittle indices results in an optimal RMAB solution.

**Definition 1.** Let  $\Phi(\lambda)$  be the set of all states for which it is optimal to take a passive action over an active action that with per-unit  $\lambda$  charge. An arm is called *indexable* if  $\Phi(\lambda)$  monotonically increases from  $\emptyset$  to  $S_i$  when  $\lambda$  increases from  $-\infty$  to  $+\infty$ . An RMAB problem is *indexable* if all the arms are indexable.

**Theorem 3.** When all workers are homogeneous (same costs and transition probabilities on arms after intervention) and satisfy indexability, then our framework outputs the optimal policy while being exactly fair to the workers.

*Proof.* Consider an MWRMAB problem instance with  $N$  arms,  $M$  homogeneous workers with costs  $c$ , and per-worker per-round budget  $B$ . Upon relaxing the per-worker budget constraint, this MWRMAB problem reduces to an RMAB instance with  $N$  arms, 2 actions (*intervention* action with cost 1 or *no-intervention* action with cost 0), and a total per-round budget of  $M\lfloor B/c \rfloor$ . Under *indexability* assumption, this problem can be solved using Whittle index policy Whittle [1988], wh—selecting  $M\lfloor B/c \rfloor$  arms with highest Whittle indices  $\lambda_i(s)$ . Allocating the selected arms among all the workers, using our algorithm, ensures two properties:

- *The per-worker budget  $B$  is met:* The total cost incurred to intervene  $M\lfloor B/c \rfloor$  selected arms of the RMAB solution is  $cM\lfloor B/c \rfloor$ . However,

$$cM\lfloor B/c \rfloor \leq cMB/c = MB.$$

Allocating these indivisible arms equally among all the workers would ensure that each worker incurs at most a cost of  $B$ .

- *Perfect fairness is achieved:* When  $N \geq M\lfloor B/c \rfloor$ , our algorithm distributes  $M\lfloor B/c \rfloor$  arms among  $M$  workers, such that each worker receives exactly  $\lfloor B/c \rfloor$  interventions. In the case when  $N < M\lfloor B/c \rfloor$ , then, our algorithm allocates  $\lfloor N/M \rfloor + 1$  arms to each of the first  $(N - \lfloor N/M \rfloor M)$  workers, and  $\lfloor N/M \rfloor$  arms to the rest of the workers. Thus, the difference between the allocations between any two workers in any round is at most 1, implying that the difference between the costs incurred is at most  $c$ . This satisfies our fairness criteria.

This completes the proof. □

### 501 E Limitations and Ethical Concerns

In this work, we focus on scenarios where the costs of interventions are computed by the planner. In scenarios, such as allocating tasks on crowdsourcing platforms (for e.g., MTurk), where costs for

performing tasks are declared by strategic crowdworkers themselves in the form of bids, the workers may not report the true costs if doing so helps them gain higher benefit from the system. To avoid such strategic behavior, strategy-proof mechanisms are required. This leads to an interesting research direction, which is outside the scope of this paper.

We also note that our algorithm is more apt for larger scale problems where OPT-fair is unable to run. For small scale problems, such as  $N = 5$ , it might be possible to execute OPT-fair algorithm and obtain a fair and efficient solution. However, as shown in Figures 4 and 5, our algorithm performs well even for  $N$  as large as 150. So, we expect our method to be applicable for obtaining fair allocations in larger scale problems.

**Ethical Concerns** In practice, the workers may have other cultural and family constraints that are hard to capture and formalize in mathematical terms. Therefore, it is important to have human-AI collaboration to assess the output of our algorithm. Moreover, although our proposed framework enables intervention resources to be human workforce (who pull the arms) and considers fairness among workers, it is better suited for domains where the arms themselves are non-human entities, such as, *areas* in anti-poaching patrolling or *machines* in machine maintenance problem. In domains where arms correspond to human beings, it is also important to be mindful of fairness across the arms.

## F More Results

See Fig. 5 for additional results on larger problem settings.

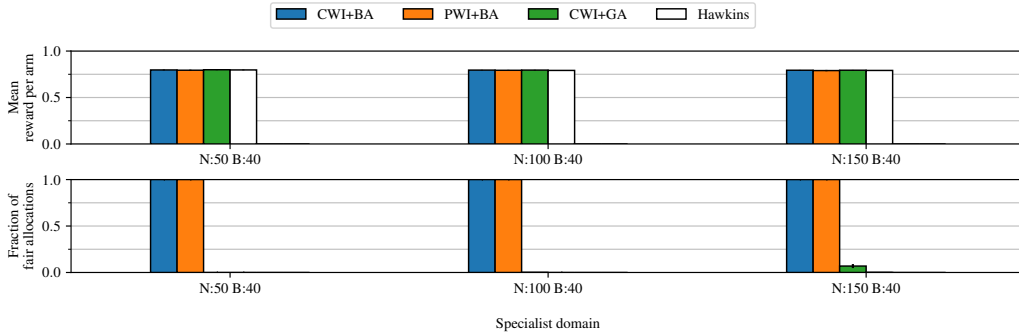

Figure 5: More results for the specialist domain with larger  $N$  and  $B$ .

We observe that the reward obtained by our proposed algorithm (CWI+BA) is almost similar to the reward-maximizing algorithm (Hawkins). Moreover, CWI+BA achieves maximum fairness. In contrast, Hawkins algorithm attains almost 0 fairness in all the runs. Note that, the OPT and OPT-fair algorithms could not be executed on larger instances because of larger memory requirements. Therefore, we could not compare against optimal algorithms for larger instances.
